# Supplementary material for: Exploring the Distribution of the Spreading Lethal Salamander Chytrid Fungus in Its Invasive Range in Europe – A Macroecological Approach
Source: PubMed Central journal article supplement (PMC5087956; doi:10.1371/journal.pone.0165682), 2016-10-31

**cddn**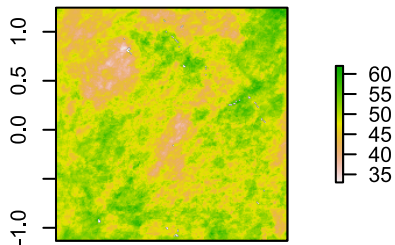**csu25**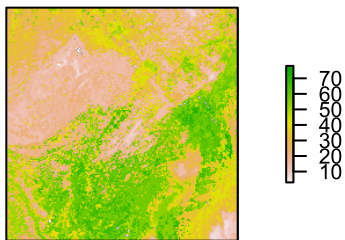**csu5**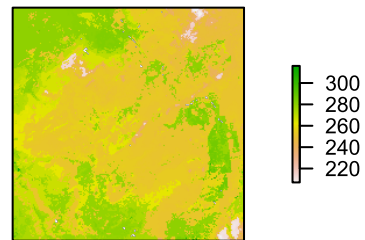**cwdn**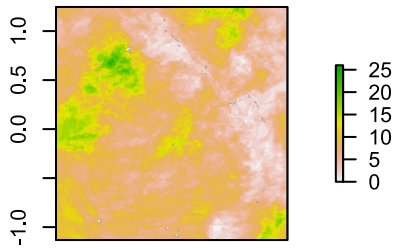**r10**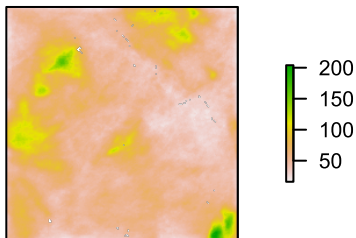**su10\_15**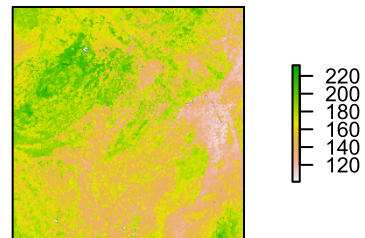**tr10\_15**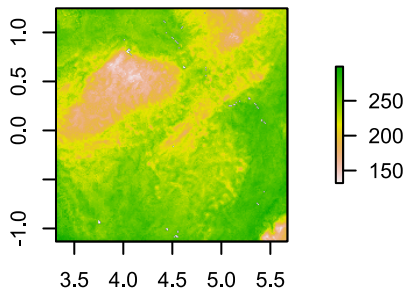

Supplement: pone.0165682.s001.pdf [file pone.0165682.s001.pdf]
