# Supplementary material for: Exploring the Distribution of the Spreading Lethal Salamander Chytrid Fungus in Its Invasive Range in Europe – A Macroecological Approach
Source: PubMed Central journal article supplement (PMC5087956; doi:10.1371/journal.pone.0165682), 2016-10-31
Supplement: pone.0165682.s003.pdf [file pone.0165682.s003.pdf]

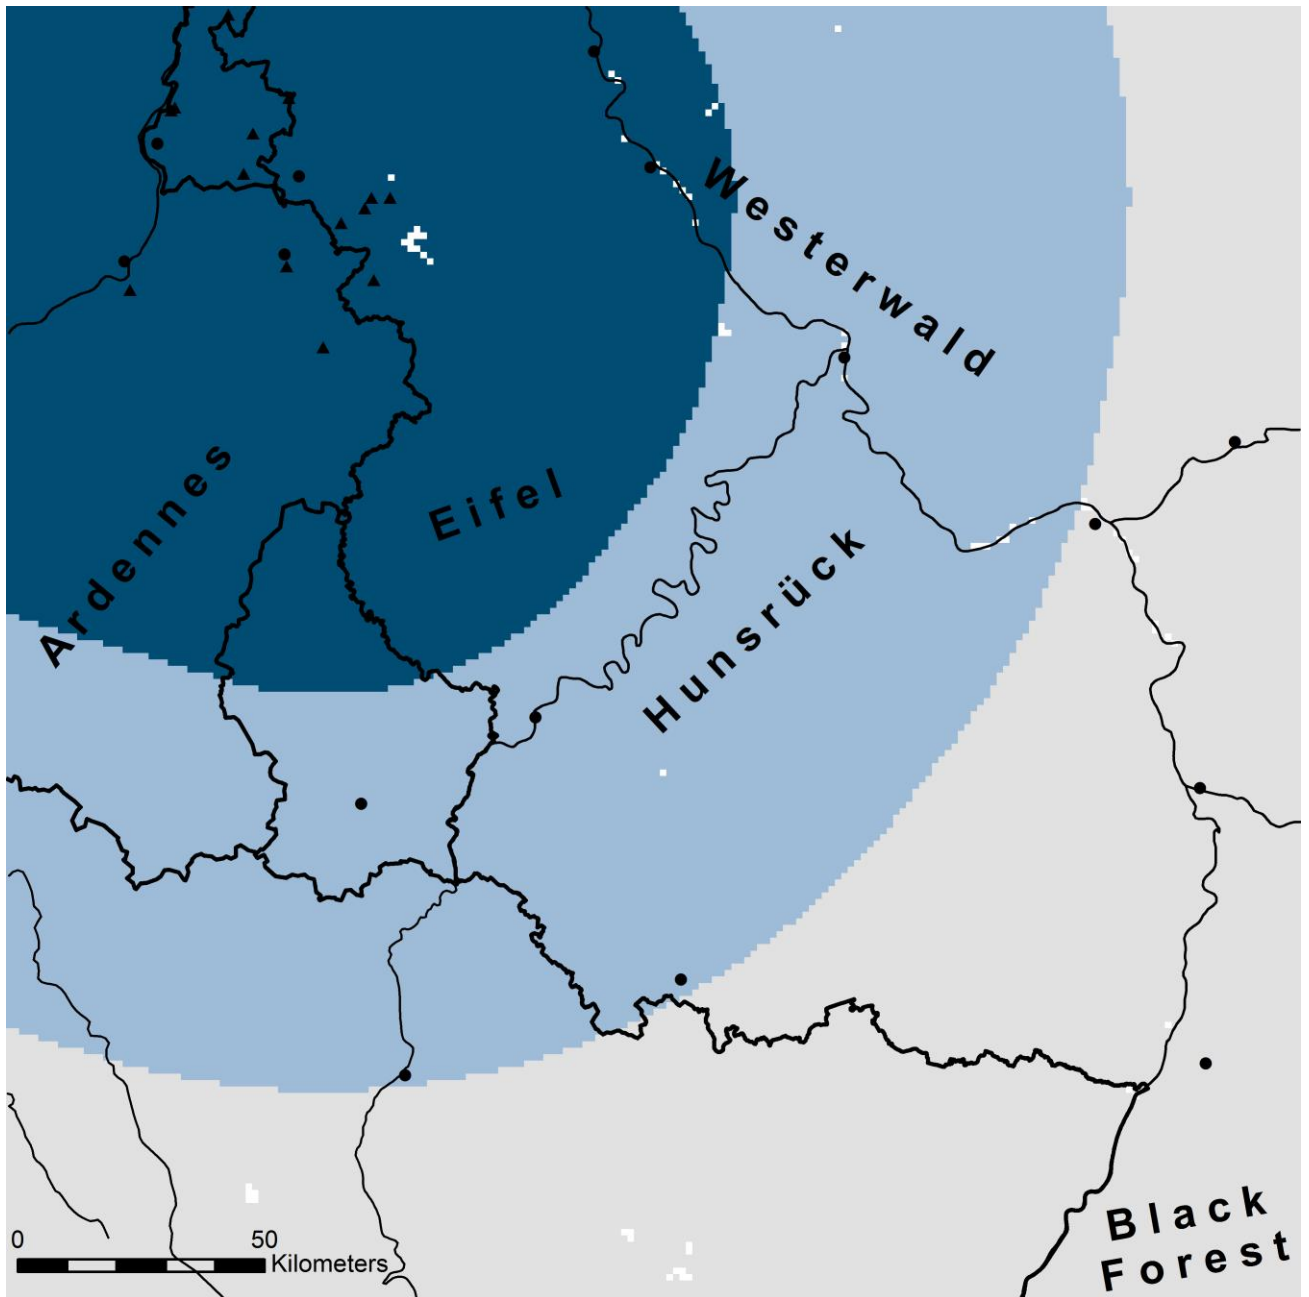

**S3 Fig. Background restricting minimum convex polygons (MCPs).**

MCP 70 km: dark blue area; MCP 150 km: dark and light blue area.
