# Supplementary material for: Exploring the Distribution of the Spreading Lethal Salamander Chytrid Fungus in Its Invasive Range in Europe – A Macroecological Approach
Source: PubMed Central journal article supplement (PMC5087956; doi:10.1371/journal.pone.0165682), 2016-10-31
Supplement: pone.0165682.s004.pdf [file pone.0165682.s004.pdf]

## **S4 Figures**

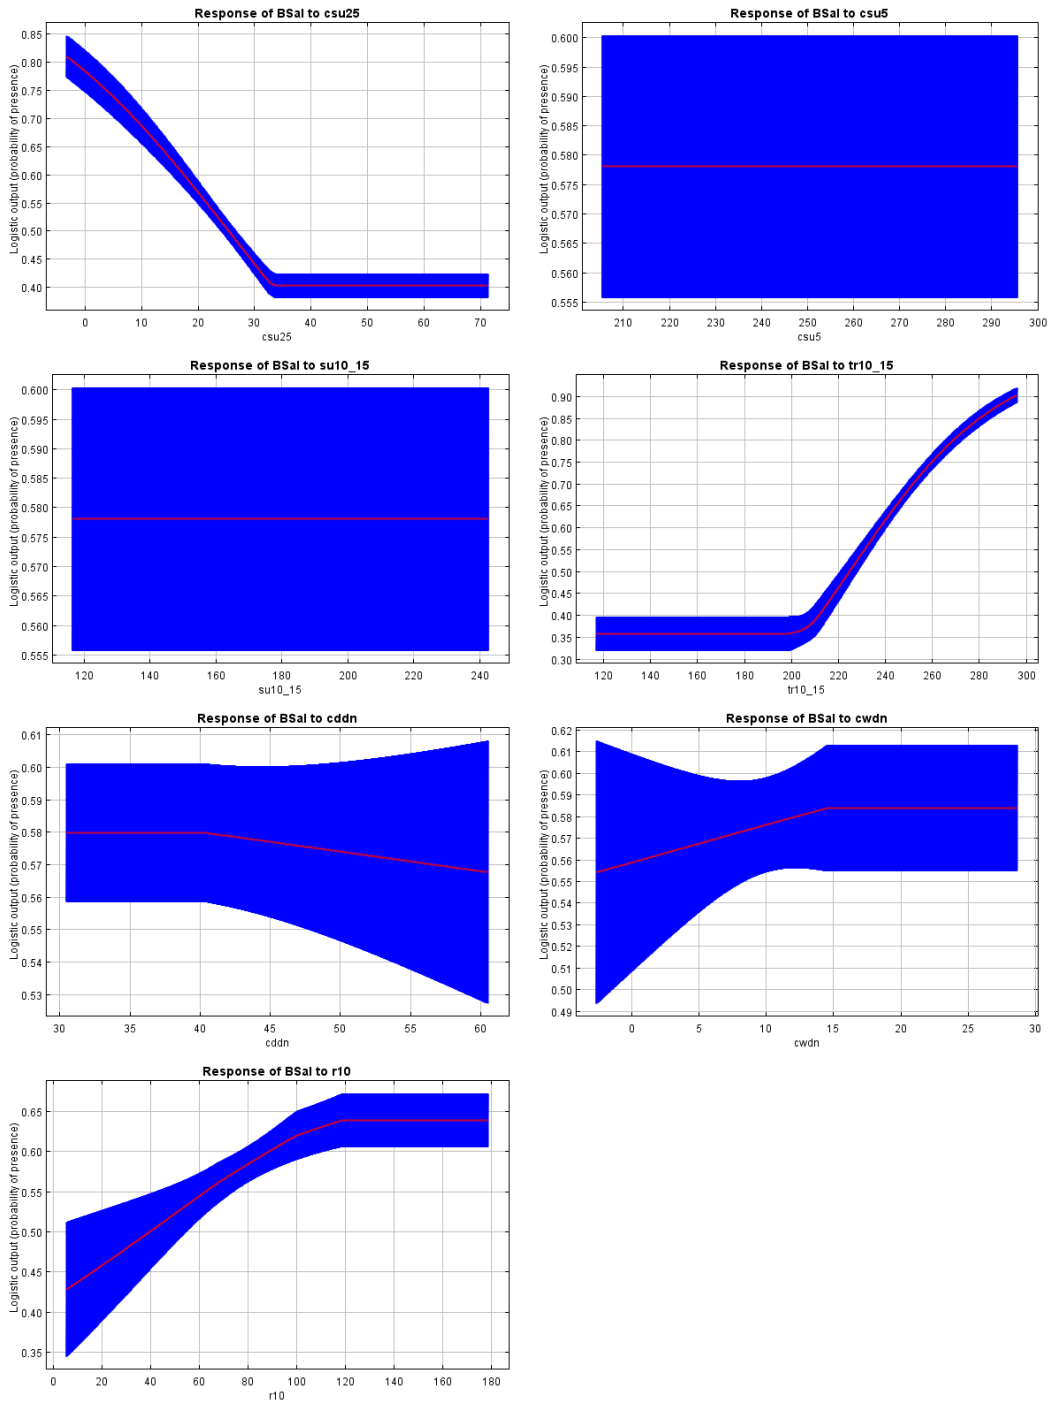

**S2 Fig A. ECA<sub>70</sub> response curves.**

Exemplary mean responses of the 14 cross-validation runs  $\pm$  one standard deviation for one replicate run of the ECA<sub>70</sub> model. The curves show the logistic output as a function of each variable, while all other variables are kept at their average value. Note different scales on the y-axis.

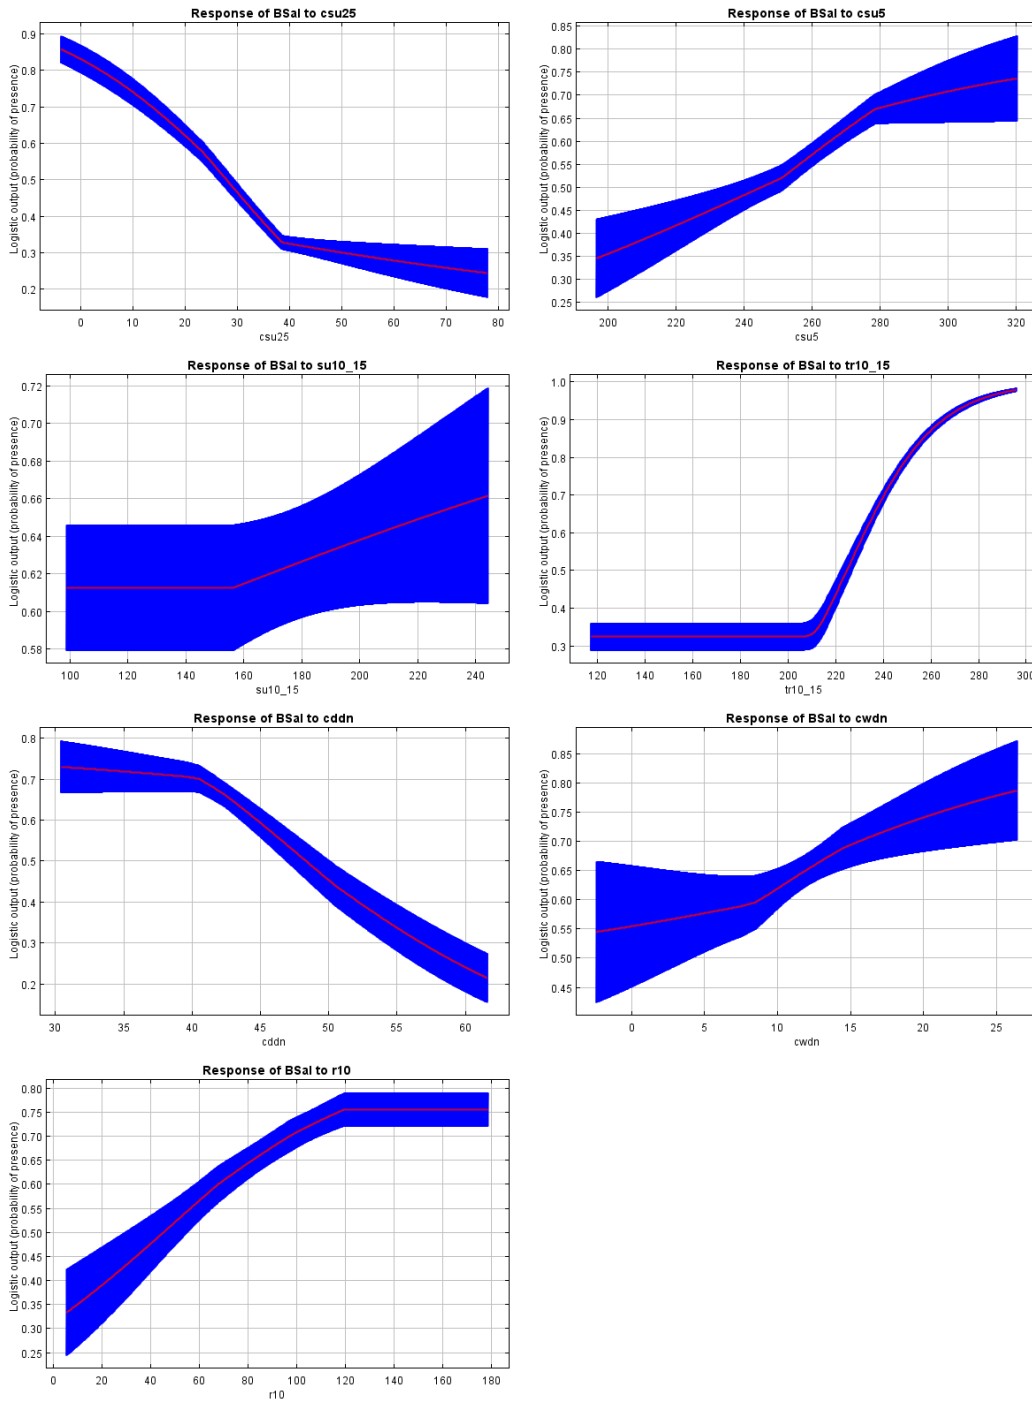

**S2 Fig B. ECA<sub>150</sub> response curves.**

Exemplary mean responses of the 14 cross-validation runs  $\pm$  one standard deviation for one replicate run of the ECA<sub>150</sub> model. The curves show the logistic output as a function of each variable, while all other variables are kept at their average value. Note different scales on the y-axis.

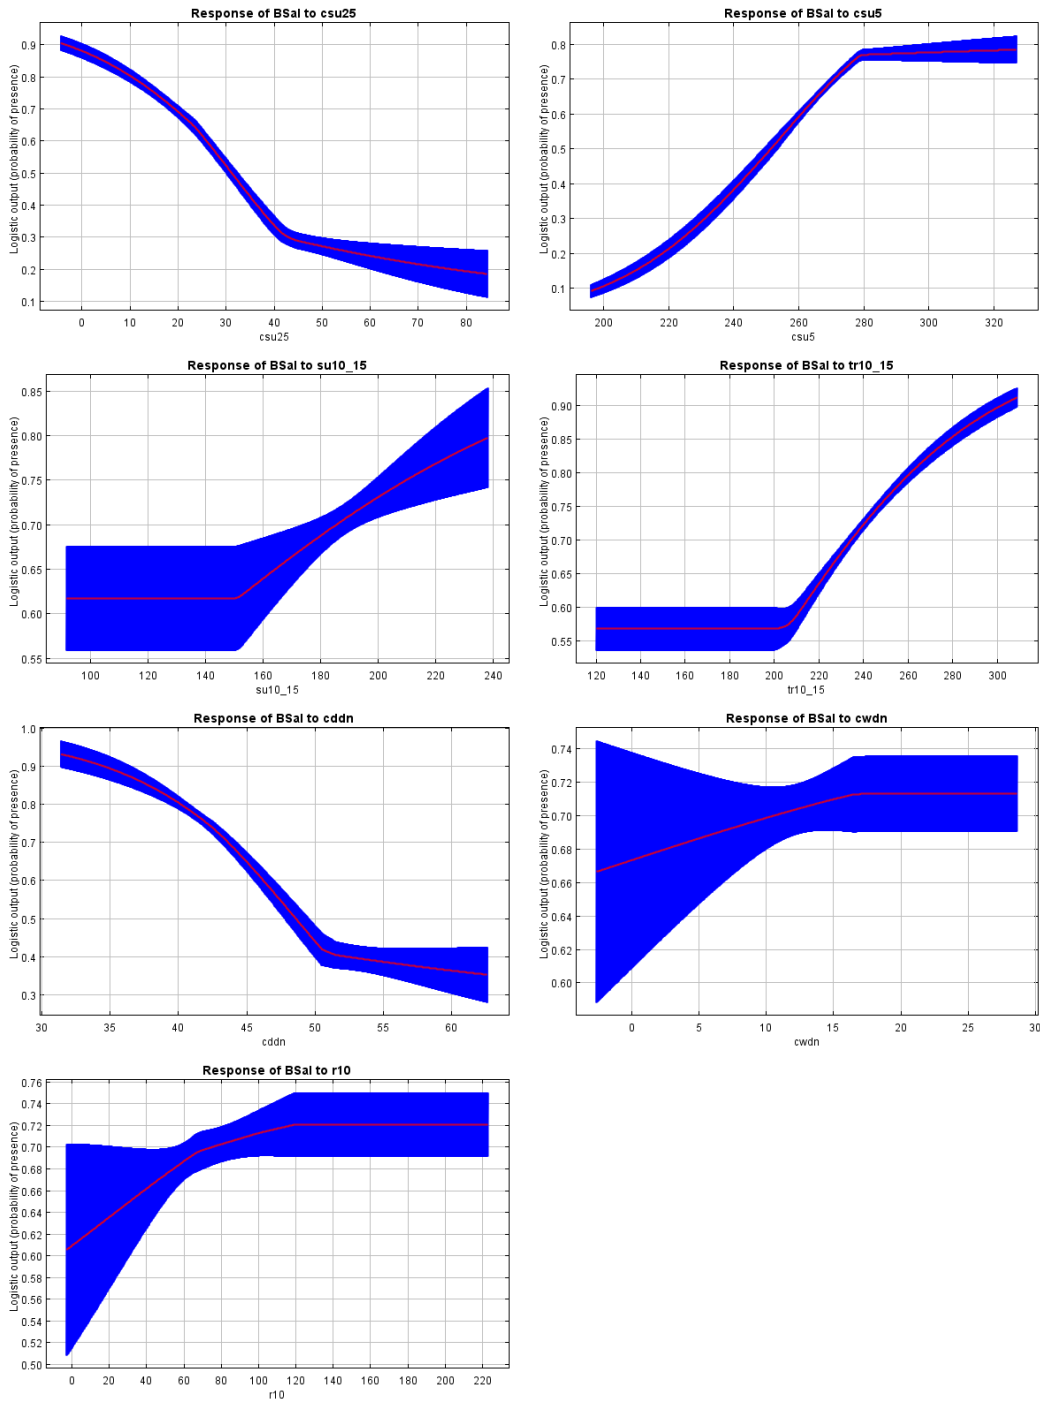

**S2 Fig C. ECA<sub>full</sub> response curves.**

Exemplary mean responses of the 14 cross-validation runs  $\pm$  one standard deviation for one replicate run of the ECA<sub>full</sub> model. The curves show the logistic output as a function of each variable, while all other variables are kept at their average value. Note different scales on the y-axis.

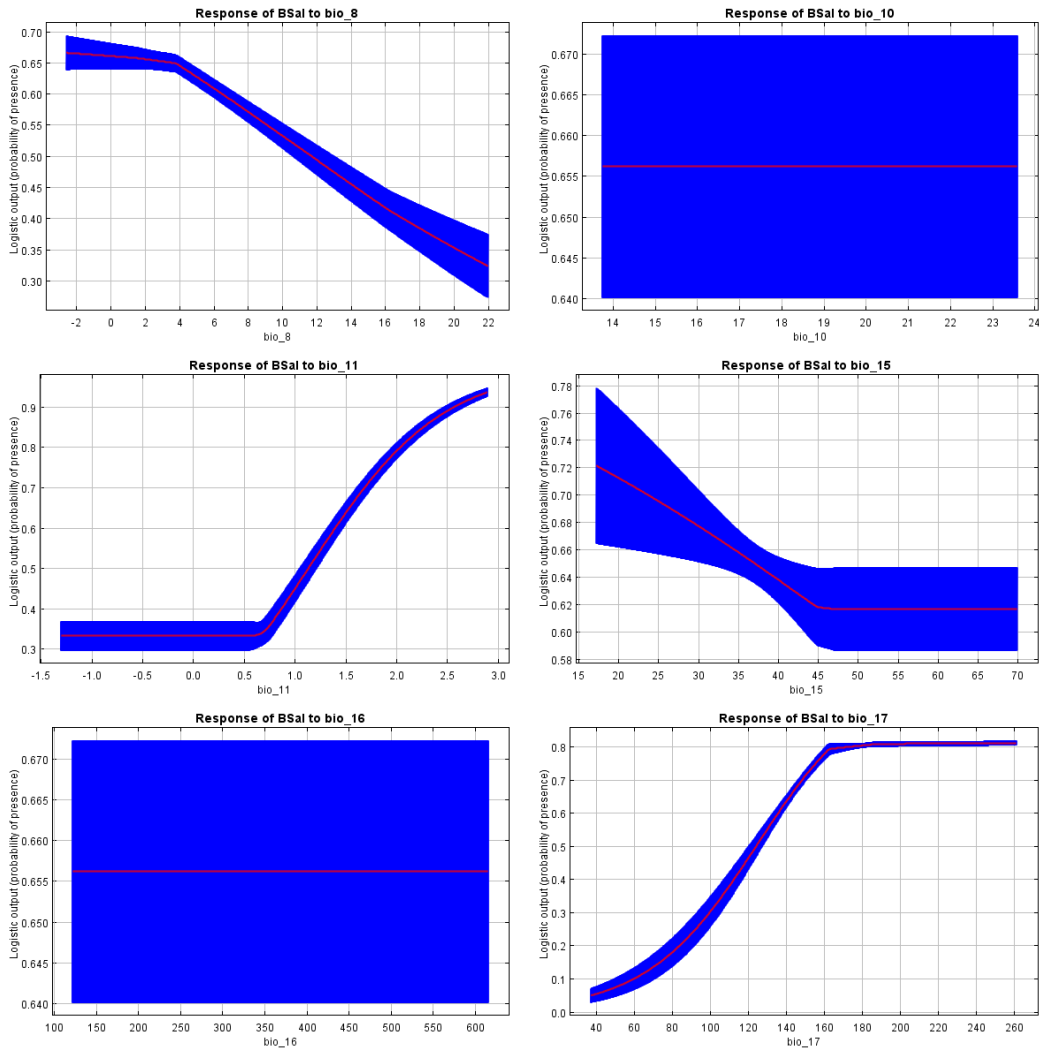

**S2 Fig D. BIO<sub>70</sub> response curves.**

Exemplary mean responses of the 14 cross-validation runs  $\pm$  one standard deviation for one replicate run of the BIO<sub>70</sub> model. The curves show the logistic output as a function of each variable, while all other variables are kept at their average value. Note different scales on the y-axis.

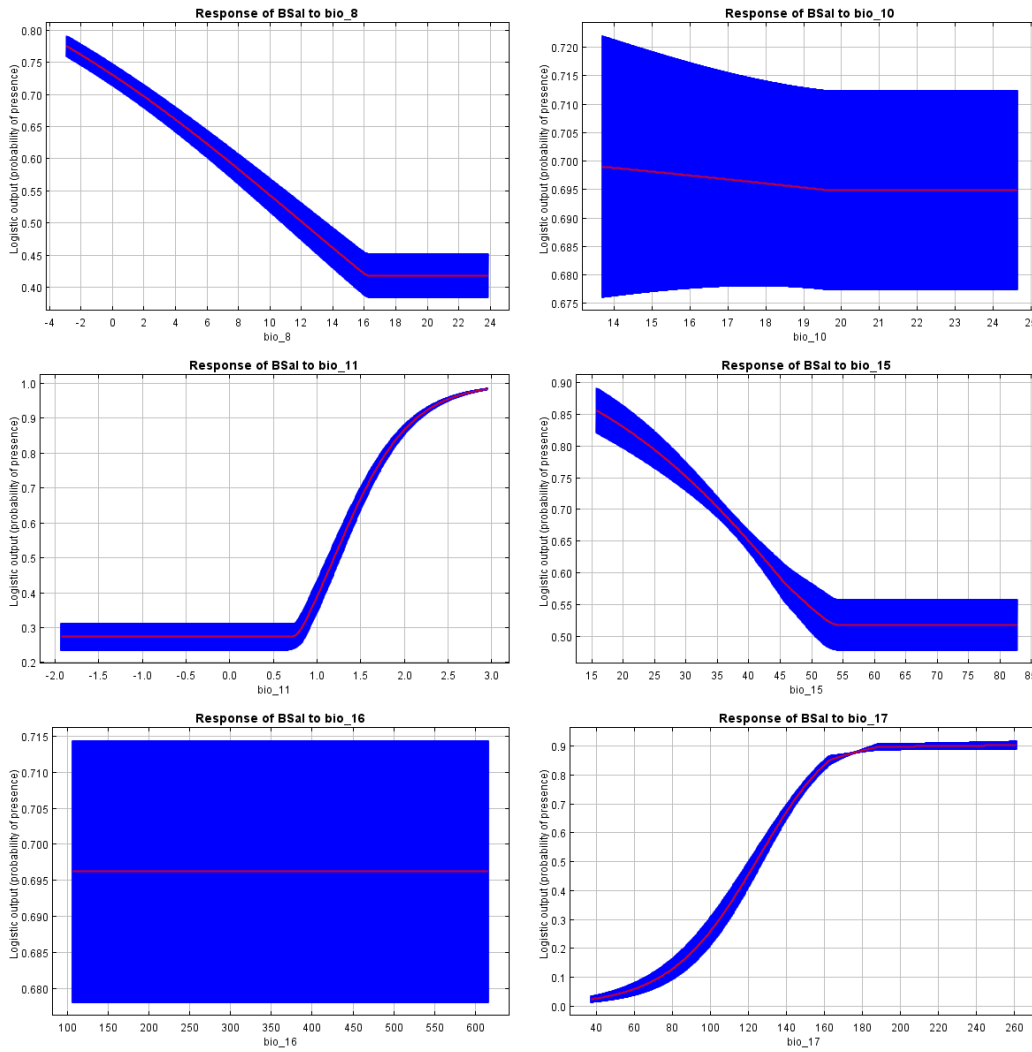

**S2 Fig E. BIO<sub>150</sub> response curves.**

Exemplary mean responses of the 14 cross-validation runs  $\pm$  one standard deviation for one replicate run of the BIO<sub>150</sub> model. The curves show the logistic output as a function of each variable, while all other variables are kept at their average value. Note different scales on the y-axis.

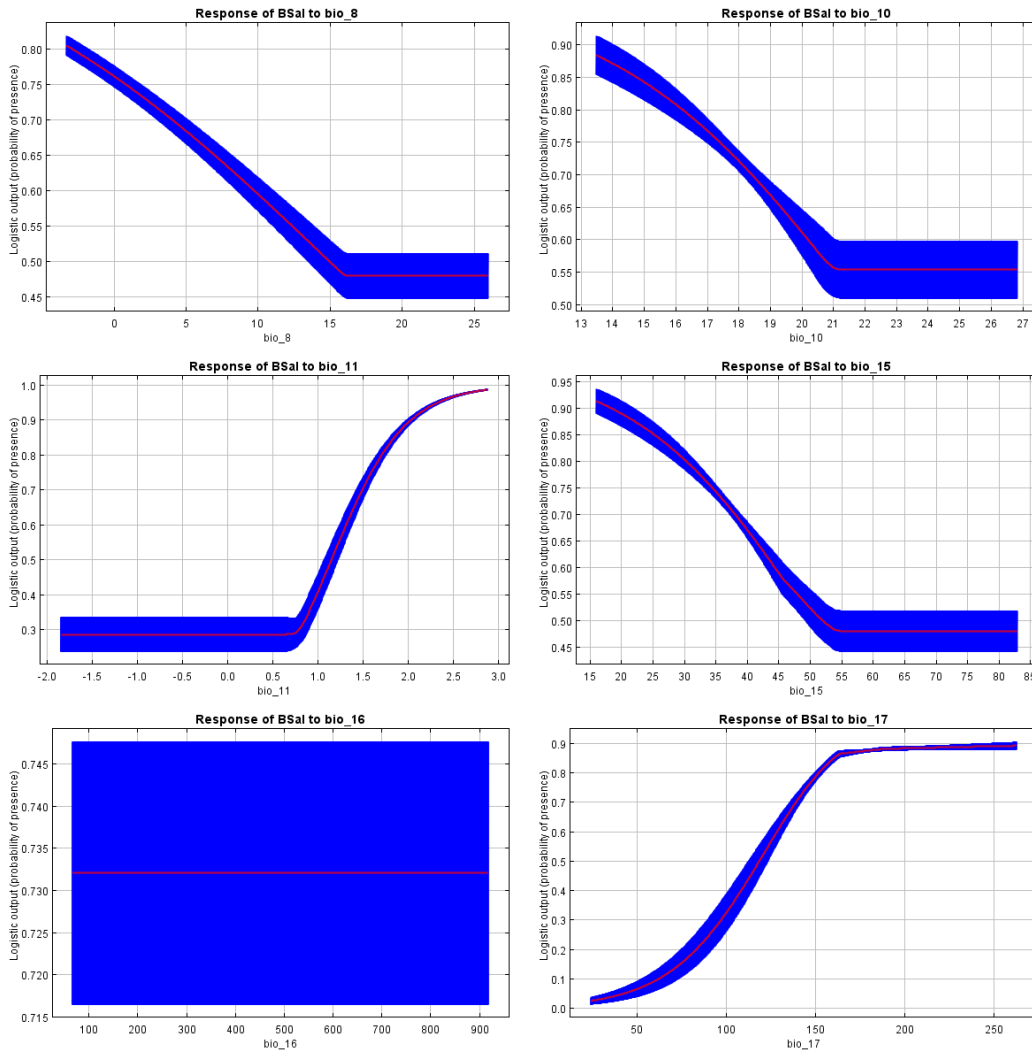

**S2 Fig F. BIO<sub>full</sub> response curves.**

Exemplary mean responses of the 14 cross-validation runs  $\pm$  one standard deviation for one replicate run of the BIO<sub>full</sub> model. The curves show the logistic output as a function of each variable, while all other variables are kept at their average value. Note different scales on the y-axis.
